# Supplementary material for: Environmental sources along natural cave ripening shape the microbiome and metabolome of artisanal blue-veined cheeses
Source: Research Square preprint supplement (doi:10.21203/rs.3.rs-1150288/v1), 2021-12-21
Supplement: Supplementary file 1 [file 56d48eef119da690da730e19.xlsx]

## Sheet: Hoja1
Compounds	CAS	RT	LRIa	Ref. LRIb
Acids
Acetic acid	64-19-7	14.776	684.4	690
Propanoic acid	79-09-4	18.936	774.8	784
2-Methyl propanoic acid	79-31-2	21.308	829.6	836
Butanoic acid	107-92-6	22.968	872.5	864
3-Methyl butanoic acid	503-74-2	24.767	913	917
2-Methyl butanoic acid	116-53-0	25.05	920.2	924
Pentanoic acid	109-52-4	26.292	952.8	955
Hexanoic acid	142-62-1	29.965	1053.1	1052
Octanoic acid	124-07-2	36.117	1239.1	1244
Decanoic acid	334-48-5	41.714	1433.6	1440
Alcohols
2-Propanol	67-63-0	8.559	537.1	539
2-Heptanol	543-49-7	25.838	942	947
2-Nonanol	628-99-9	33.097	1143.5	1143
Aldehydes
3-Methyl butanal	590-86-3	14.921	688	692
Benzene compounds
Toluene	108-88-3	19.53	789	794
Esters
Methyl butanoate	623-42-7	17.55	744.6	754
Ethyl butanoate	105-54-4	20.918	819.8	826
Isopentyl acetate	123-92-2	24.194	900.1	902
Propyl butanoate	105-66-8	24.944	918.4	921
Methyl hexanoate	106-70-7	26.051	946.6	949
Ethyl hexanoate	123-66-0	28.774	1018.7	1024
2-Pentylbutyrate	60415-61-4	29.653	1045.5	1046
Methyl octanoate	111-11-5	33.221	1147.5	1155
Ethyl octanoate	106-32-1	35.467	1217.7	1222
Isopropyl octanoate	5458-59-3	36.502	1253.1	1252
Isoamyll hexanoate	2198-61-0	37.173	1275.8	1275
Methyl decanoate	110-42-9	39.382	1348.6	1350
Ethyl decanoate	110-38-3	41.297	1416.9	1422
Isopentyl octanoate	2035-99-6	42.765	1471.5	1479
Isobutyl decanoate	30673-38-2	43.865	1514.9	1609
Ethyl dodecanoate	106-33-2	46.973	1617.5	1621
Ketones
2-Butanone	78-93-3	12.479	634.2	638
2-Pentanone	107-87-9	16.631	724.4	730
Acetoin	513-86-0​	18.827	772.8	778
2-Hexanone	591-78-6	21.235	827	834
2-Heptanone	110-43-0	25.424	931.1	936
2-Octanone	111-13-7	29.246	1032.1	1035
8-Nonen-2-one	5009-32-5	32.681	1132.7	1133
2-Nonanone	821-55-6	32.796	1135.6	1140
2-Undecanone	112-12-9	39.108	1339.5	1353
Lactone compounds
γ-Hexalactone	695-06-7	33.782	1167.1	1167
Pyrazine compounds
Trimethylpyrazine	14667-55-1	29.425	1037.7	1039
aLRI: linear retention indices of the compounds relative to an alkane series.
bRef. LRI: superscripts show identification using either authentic standards and retention indices from the literature.
