# Supplementary material for: Environmental sources along natural cave ripening shape the microbiome and metabolome of artisanal blue-veined cheeses
Source: Research Square preprint supplement (doi:10.21203/rs.3.rs-1150288/v1), 2021-12-21
Supplement: Supplementary file 2 [file 6cf54c62b32eb8a46a4ea4ca.xlsx]

## Sheet: Sheet1
Cluster code	Spe1	Spe2	size (bp)	num HGTs	num CDS	Plasflow	Plasmid (relaxase)	Transposase	Phage	Integrase	00010_Glycolysis_/_Gluconeogenesis_[PATH:ko00010]	00052_Galactose_metabolism_[PATH:ko00052]	00220_Arginine_biosynthesis	00240_Pyrimidine_metabolism_[PATH:ko00240]	00260_Glycine,_serine_and_threonine_metabolism_[PATH:ko00260]	00300_Lysine_biosynthesis_[PATH:ko00300]	00500_Starch_and_sucrose_metabolism_[PATH:ko00500]	00521_Streptomycin_biosynthesis_[PATH:ko00521]	00564_Glycerophospholipid_metabolism_[PATH:ko00564]	00620_Pyruvate_metabolism_[PATH:ko00620]	00900_Terpenoid_backbone_biosynthesis_[PATH:ko00900]	01003_Glycosyltransferases_[BR:ko01003]	01005_Lipopolysaccharide_biosynthesis_proteins_[BR:ko01005]	01011_Peptidoglycan_biosynthesis_and_degradation_proteins_[BR:ko01011]	01501_beta-Lactam_resistance_[PATH:ko01501]	02000_Transporters_[BR:ko02000]	02010_ABC_transporters_[PATH:ko02010]	02024_Quorum_sensing_[PATH:ko02024]	02048_Prokaryotic_defense_system_[BR:ko02048]	03000_Transcription_factors_[BR:ko03000]	03009_Ribosome_biogenesis_[BR:ko03009]	03032_DNA_replication_proteins_[BR:ko03032]	03036_Chromosome_and_associated_proteins_[BR:ko03036]	03070_Bacterial_secretion_system_[PATH:ko03070]	03110_Chaperones_and_folding_catalysts_[BR:ko03110]	03440_Homologous_recombination_[PATH:ko03440]	04131_Membrane_trafficking_[BR:ko04131]	04812_Cytoskeleton_proteins_[BR:ko04812]	99976_Replication_and_repair	99977_Transport	99980_Enzymes_with_EC_numbers	99995_Signaling_proteins	99997_Function_unknown
cluster_1	Lactococcus lactis	Tetragenococcus koreensis	58536	5	40	0	1	0	1	0	0	0	0	0	0	0	0	0	0	0	0	0	0	0	0	0	0	1	1	0	0	0	0	1	0	1	0	0	0	0	0	0	0
cluster_2	Lactococcus lactis	Tetragenococcus koreensis	40207	6	25	0	0	0	0	0	0	0	0	0	0	0	0	0	0	0	0	0	0	0	0	0	0	0	0	0	0	1	0	1	1	0	0	1	0	0	0	0	0
cluster_3	Lactococcus lactis	Staphylococcus equorum	36686	4	22	0	0	1	1	0	0	0	0	0	0	0	0	0	0	0	0	0	0	0	0	0	0	0	0	0	0	0	0	0	0	1	0	0	1	0	0	1	0
cluster_4	Lactococcus lactis	Tetragenococcus koreensis	34694	1	22	0	0	0	0	0	0	0	0	0	0	0	0	0	0	0	0	0	0	0	0	0	0	0	0	0	0	1	0	1	1	0	0	1	0	0	0	0	0
cluster_5	Alkalibacterium	Tetragenococcus halophilus	33475	1	45	0	0	1	1	0	0	0	0	1	0	0	0	0	0	0	0	0	0	0	0	0	0	0	0	0	0	0	0	0	0	0	0	0	1	0	0	0	0
cluster_6	Lactococcus lactis	Tetragenococcus koreensis	32927	1	21	0	0	0	0	0	0	0	0	0	0	0	0	0	0	0	0	0	0	0	0	0	0	0	0	0	0	1	0	1	1	0	0	1	0	0	0	0	0
cluster_7	Lactococcus lactis	Staphylococcus equorum	32601	6	20	0	0	1	1	0	0	0	0	0	0	0	0	0	0	0	0	0	0	0	0	0	0	0	0	0	0	0	0	0	0	0	0	0	1	0	0	1	0
cluster_8	Brachybacterium	Corynebacterium sp.	30112	1	27	0	0	0	0	1	0	0	0	0	0	0	0	0	0	0	0	0	0	0	0	7	3	0	0	2	1	0	0	0	0	0	0	0	0	0	0	0	1
cluster_9	Lactococcus lactis	Tetragenococcus koreensis	29142	1	37	1	1	0	0	0	0	0	0	0	0	0	0	0	0	0	0	0	0	0	0	0	0	0	2	0	0	0	0	0	0	0	0	0	0	0	1	0	0
cluster_10	Acidipropionibacterium jensenii	Bifidobacterium crudilactis	28201	4	29	1	1	0	1	0	0	0	0	0	0	0	0	0	0	0	0	0	0	0	0	2	0	0	0	1	0	0	0	0	0	0	1	0	0	0	0	0	0
cluster_11	Alkalibacterium	Tetragenococcus koreensis	27040	2	34	0	0	1	1	0	0	0	0	1	0	0	0	0	0	0	0	0	0	0	0	0	0	0	0	0	0	0	0	0	0	0	0	0	1	0	0	0	0
cluster_12	Acidipropionibacterium jensenii	Bifidobacterium crudilactis	25829	1	28	1	1	0	1	0	0	0	0	0	0	0	0	0	0	0	0	0	0	0	0	2	0	0	0	1	0	0	0	0	0	0	1	0	0	0	0	0	0
cluster_13	Lactococcus lactis	Tetragenococcus koreensis	25175	8	15	0	0	0	0	0	0	1	0	0	0	0	0	1	0	0	1	1	4	0	0	2	0	0	0	0	0	0	0	0	0	0	0	0	0	1	1	0	0
cluster_14	Lactococcus lactis	Tetragenococcus koreensis	24740	1	23	0	0	0	0	0	0	0	0	0	0	0	0	0	0	0	0	0	0	0	0	0	0	0	0	0	0	0	0	1	0	0	0	0	0	0	0	0	0
cluster_15	Enterococcus	Lactococcus lactis	24358	2	20	1	1	0	0	0	0	0	0	0	0	0	0	0	0	0	0	0	0	0	0	0	0	0	0	0	0	0	0	1	0	0	0	0	0	0	0	0	0
cluster_16	Chryseobacterium	Lactococcus lactis	24108	1	12	0	0	0	0	0	0	2	0	0	0	0	0	0	0	0	1	1	3	0	0	2	0	0	0	0	0	0	0	0	0	0	0	0	0	1	1	0	0
cluster_17	Lactococcus lactis	Tetragenococcus koreensis	23474	5	21	0	0	0	0	0	0	0	0	1	0	0	0	0	0	0	0	0	0	0	0	0	0	0	0	0	0	0	0	0	0	0	0	0	1	0	0	0	0
cluster_18	Alkalibacterium	Tetragenococcus halophilus	23466	1	30	0	0	1	1	0	0	2	0	0	0	0	0	0	0	0	1	1	3	0	0	2	0	0	0	0	0	0	0	0	0	0	0	0	0	1	1	0	0
cluster_19	Lactococcus lactis	Tetragenococcus koreensis	23353	2	20	0	0	0	0	0	1	0	1	0	1	2	3	0	0	1	0	0	0	0	2	0	0	0	0	1	0	0	0	0	0	0	0	0	0	0	0	0	0
cluster_20	Lactococcus lactis	Tetragenococcus koreensis	22729	8	21	0	0	0	0	0	0	0	0	0	0	0	0	0	0	0	0	0	0	0	0	0	0	0	0	0	0	0	0	0	0	0	0	0	1	0	0	0	0
cluster_21	Alkalibacterium	Tetragenococcus koreensis	21838	1	24	0	0	1	1	0	0	0	0	0	0	0	0	0	1	0	0	0	0	1	0	0	0	0	4	0	0	0	0	0	0	0	0	0	0	0	0	0	0
cluster_22	Bifidobacterium crudilactis	Yaniella	21668	1	23	1	0	0	1	0	1	0	1	0	1	2	3	0	0	1	0	0	0	0	2	0	0	0	0	1	0	0	0	0	0	0	0	0	0	0	0	0	0
cluster_23	Lactococcus lactis	Tetragenococcus koreensis	21662	1	21	0	0	0	0	0	0	0	0	0	0	0	0	0	0	0	0	0	0	0	0	0	0	0	0	0	0	1	0	1	1	0	0	0	0	0	0	0	0
cluster_24	Lactococcus lactis	Tetragenococcus koreensis	21537	2	20	0	0	0	0	0	1	0	1	0	1	2	3	0	0	1	0	0	0	0	2	0	0	0	0	1	0	0	0	0	0	0	0	0	0	0	0	0	0
cluster_25	Lactococcus lactis	Tetragenococcus koreensis	20255	1	12	0	0	0	0	0	0	0	0	0	0	0	0	0	0	0	0	0	0	0	0	0	0	0	0	0	0	0	0	1	0	0	0	1	0	0	0	0	0
cluster_26	Lactococcus lactis	Tetragenococcus koreensis	20146	1	19	0	0	0	0	0	0	0	0	0	0	0	0	0	0	0	0	0	0	0	0	0	0	0	1	0	0	0	1	0	0	0	0	0	1	0	0	0	0
